# Supplementary material for: Rainfall erosivity in catchments contaminated with fallout from the Fukushima Daiichi nuclear power plant accident
Source: Copernicus journal article supplement (doi:10.5194/hess-20-2467-2016), 2016-06-23
Supplement: Supplementary file 1 [file hess-20-2467-2016-supplement.zip]

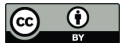

## *Supplement of*

# **Rainfall erosivity in catchments contaminated with fallout from the Fukushima Daiichi nuclear power plant accident**

**J. Patrick Laceby et al.**

*Correspondence to:* J. Patrick Laceby ([placeby@lsce.ipsl.fr](mailto:placeby@lsce.ipsl.fr))

- [hess-20-2467-2016-supplement-title-page.pdf](#)
- Dataset 1 R-factor Maps
  - R01.asc
  - R02.asc
  - R03.asc
  - R04.asc
  - R05.asc
  - R06.asc
  - R07.asc
  - R08.asc
  - R09.asc
  - R10.asc
  - R11.asc
  - R12.asc
  - Ryear.asc
  - TO READ.txt
- Dataset 2 Table of rainfall analyses results.csv
- Supplementary Information Figure S1 and Table S1.pdf

The copyright of individual parts of the supplement might differ from the CC-BY 3.0 licence.
