# Supplementary material for: Rainfall erosivity in catchments contaminated with fallout from the Fukushima Daiichi nuclear power plant accident
Source: Copernicus journal article supplement (doi:10.5194/hess-20-2467-2016), 2016-06-23
Supplement: Supplementary file 2 [file hess-20-2467-2016-supplement.zip]

### Supplementary Information:

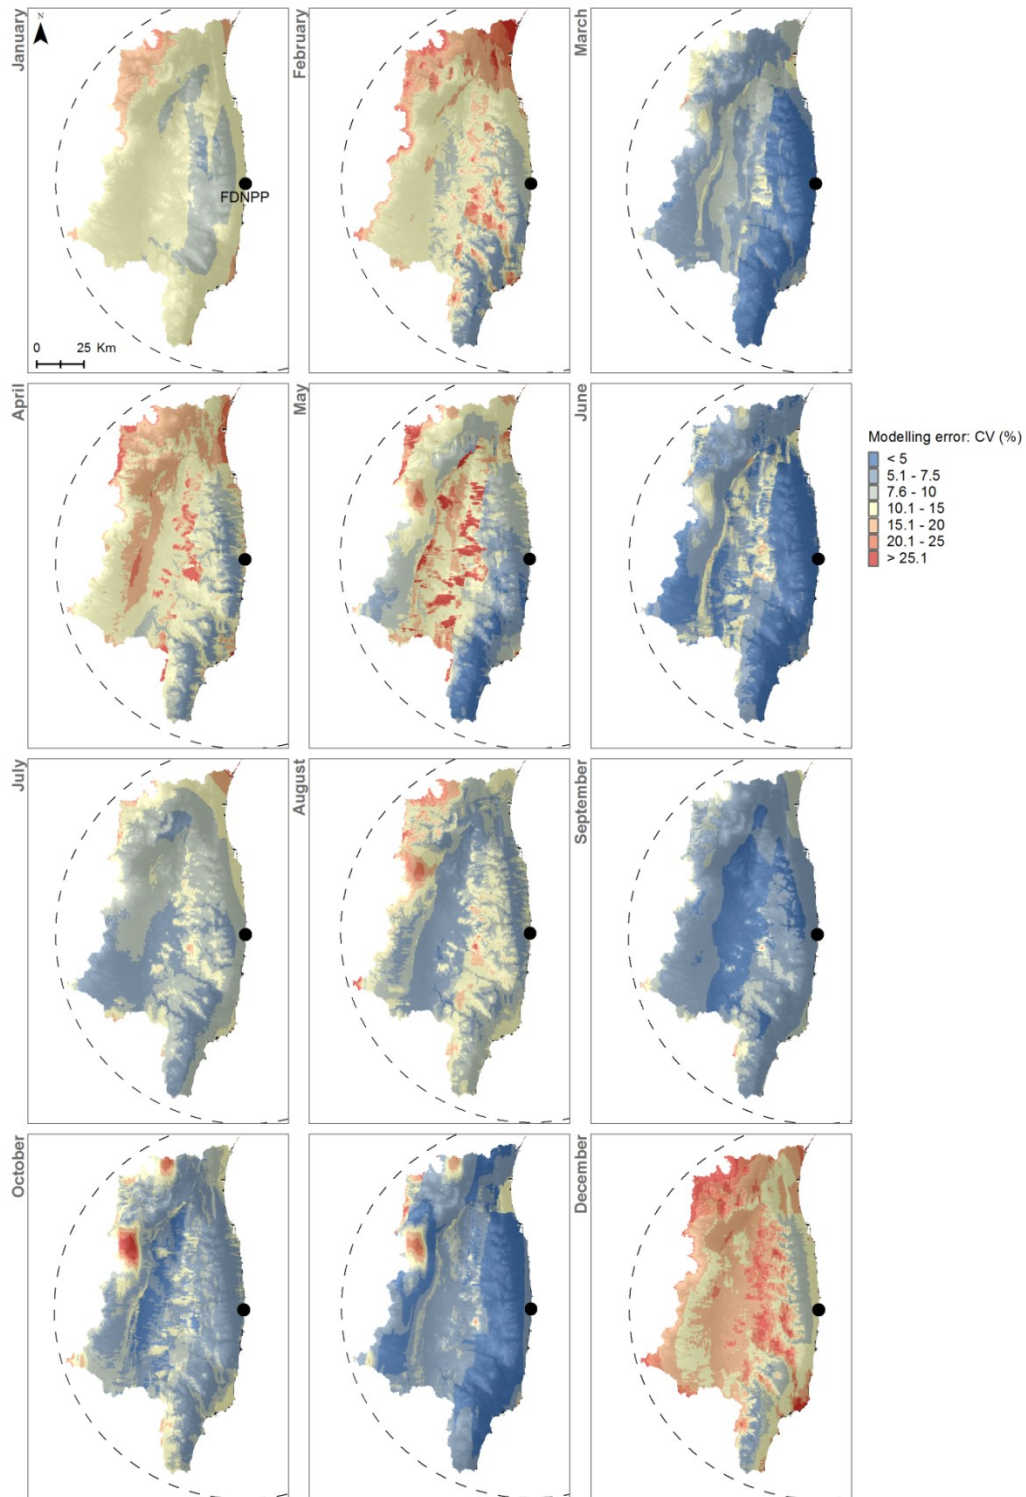

**Figure S1.** Modelling errors associated to the monthly R-factor maps depicted in Fig. 8.

**Table S1.** Tropical storms and typhoons that impacted the Fukushima Prefecture since the FDNPP accident along with their regional precipitation and rainfall erosivity characteristics.

| Storm Name | Peak classification   | Mean Event Duration (h) | Event Time Period |            | Regional Precipitation (mm) |     |     | Regional $EI_{30}$ ( $MJ\ mm^{-1}\ ha^{-1}\ h^{-1}$ ) |      |      |
|------------|-----------------------|-------------------------|-------------------|------------|-----------------------------|-----|-----|-------------------------------------------------------|------|------|
|            |                       |                         | Start             | Finish     | Mean                        | SD  | Max | Mean                                                  | SD   | Max  |
| Songda     | Typhoon               | 40                      | 28/05/2011        | 29/05/2011 | 75                          | 45  | 192 | 143                                                   | 195  | 930  |
| Ma-on      | Typhoon               | 24                      | 19/07/2011        | 20/07/2011 | 79                          | 52  | 223 | 410                                                   | 554  | 2224 |
| Talas      | Severe tropical storm | 40                      | 31/08/2011        | 03/09/2011 | 63                          | 52  | 225 | 256                                                   | 491  | 2550 |
| Roke       | Typhoon               | 55                      | 19/09/2011        | 20/09/2011 | 231                         | 48  | 339 | 1695                                                  | 1066 | 5089 |
| Guchol     | Typhoon               | 18                      | 19/06/2012        | 19/06/2012 | 104                         | 56  | 286 | 676                                                   | 804  | 4013 |
| Jelawat    | Typhoon               | 7                       | 30/09/2012        | 30/09/2012 | 43                          | 17  | 95  | 261                                                   | 197  | 953  |
| Toraji     | Severe tropical storm | 18                      | 04/09/2013        | 05/09/2013 | 41                          | 24  | 117 | 232                                                   | 281  | 1172 |
| Man-yi     | Typhoon               | 19                      | 14/09/2013        | 15/09/2013 | 110                         | 46  | 206 | 995                                                   | 792  | 3373 |
| Wipha      | Typhoon               | 18                      | 15/10/2013        | 15/10/2013 | 113                         | 18  | 151 | 343                                                   | 130  | 711  |
| Francisco  | Typhoon               | 61                      | 20/10/2013        | 24/10/2013 | 108                         | 33  | 191 | 205                                                   | 223  | 1233 |
| Mitag      | Tropical storm        | 24                      | 10/06/2014        | 11/06/2014 | 51                          | 26  | 106 | 118                                                   | 124  | 439  |
| Neoguri    | Typhoon               | 28                      | 08/07/2014        | 09/07/2014 | 75                          | 29  | 150 | 352                                                   | 329  | 1147 |
| Halong     | Typhoon               | 32                      | 07/08/2014        | 10/08/2014 | 64                          | 31  | 130 | 347                                                   | 369  | 1591 |
| Phanfone   | Typhoon               | 28                      | 05/10/2014        | 05/10/2014 | 123                         | 37  | 196 | 454                                                   | 373  | 1595 |
| Vongfong   | Typhoon               | 16                      | 13/10/2014        | 13/10/2014 | 93                          | 36  | 187 | 580                                                   | 514  | 1910 |
| Nangka     | Typhoon               | 18                      | 15/07/2015        | 16/07/2015 | 85                          | 45  | 191 | 628                                                   | 760  | 3813 |
| Etau       | Severe tropical storm | 90                      | 06/09/2015        | 09/09/2015 | 240                         | 125 | 573 | 1581                                                  | 1577 | 7887 |
